# Supplementary material for: The newly developed genomic-SSR markers uncover the genetic characteristics and relationships of olive accessions
Source: PeerJ. 2020 Feb 13;8:e8573. doi: 10.7717/peerj.8573 (PMC7024576; doi:10.7717/peerj.8573)
Supplement: Supplemental Information 1 [file peerj-08-8573-s005.xlsx]

## Sheet: Sheet1
code	name	group	BFU0201		BFU0202		BFU0301		BFU0308		BFU0405		BFU0510		BFU0601		BFU0602		BFU0707		BFU0803		BFU0808		BFU0902		BFU1004		BFU1008		BFU1101		BFU1204		BFU1304		BFU1309		BFU1902		BFU1908		BFU2202
1	XiNo.3	Greece	244	244	187	190	286	289	330	330	217	223	120	135	211	268	276	306	243	246	251	257	207	207	283	283	238	238	252	252	290	290	155	155	257	257	235	235	190	190	208	220	216	225
2	Frantoio	Italy	244	250	184	190	286	286	282	330	220	223	117	135	211	268	282	303	243	249	242	257	204	204	298	298	238	238	252	252	290	302	149	152	251	266	238	238	190	196	208	208	216	225
3	Berat	Albania	244	244	178	190	304	304	282	282	226	226	114	120	262	268	285	303	246	249	251	263	207	207	283	292	241	241	252	252	299	311	149	149	251	257	238	238	196	196	208	223	225	225
4	Dritta	Italy	247	247	190	193	289	289	357	357	226	226	114	123	211	262	285	285	246	246	251	254	204	204	292	292	238	241	252	252	299	302	152	152	260	260	238	244	190	214	208	208	225	225
5	Rosciola	Italy	247	247	190	193	289	289	357	357	226	226	114	123	211	262	285	285	246	246	251	254	204	204	292	292	238	241	249	249	299	302	152	152	260	260	238	244	190	214	208	220	225	225
6	Grignan	Italy	247	250	184	193	304	304	282	282	220	220	117	135	211	262	282	282	246	249	251	257	207	207	298	298	241	241	249	249	290	290	149	152	260	266	238	244	196	199	208	208	225	225
8	Leccino	Italy	247	250	184	193	0	0	282	282	220	220	117	135	211	262	282	282	246	249	251	257	201	207	298	298	241	241	249	249	290	290	149	152	260	266	241	241	196	199	208	208	225	225
9	Chenggu32	China	244	244	178	190	286	286	282	357	226	226	114	135	211	262	282	285	246	246	242	254	204	204	298	298	238	238	249	249	299	299	152	152	257	257	238	238	190	214	208	220	219	219
10	Ottibratica	Italy	247	250	190	199	286	295	282	282	220	226	117	117	262	268	291	315	249	249	248	251	201	207	319	319	241	241	255	255	302	302	149	152	260	260	0	0	190	196	208	208	219	219
11	Mixaj	Albania	247	250	190	199	286	295	282	282	220	226	117	117	262	268	0	0	0	0	248	251	201	207	319	319	241	241	255	255	302	302	149	152	260	260	235	235	190	196	205	208	219	219
12	Lucques	France	244	250	184	190	286	286	282	330	220	223	117	135	211	268	282	303	249	249	242	257	201	201	298	298	238	238	249	249	290	302	149	152	251	266	238	238	190	196	208	220	216	225
13	Moraiolo	Italy	244	244	190	190	295	295	282	357	223	226	117	123	262	268	285	285	249	249	248	257	204	204	298	298	238	238	252	252	290	302	149	149	251	260	0	0	190	196	205	208	216	225
16	Salonenqne	France	244	244	190	199	304	304	282	282	220	226	120	123	262	268	285	285	246	246	251	254	207	207	298	304	241	241	261	261	299	299	152	152	260	260	238	244	196	214	208	220	225	225
17	Unnamed	China	244	247	190	193	286	286	330	357	220	226	120	135	211	262	282	303	246	249	251	263	207	207	298	298	238	238	252	252	290	290	149	152	260	260	238	244	196	196	208	220	225	225
18	Jiufeng	China	250	250	184	190	304	304	282	282	223	226	120	135	211	268	282	285	249	249	242	251	201	201	283	298	241	241	252	261	290	311	149	152	257	266	238	238	190	214	208	220	216	216
19	Pendolino	Italy	250	250	184	190	304	304	282	282	220	226	117	135	211	268	282	282	246	246	242	251	201	201	292	298	238	238	249	261	290	302	152	152	260	266	238	238	190	199	208	220	225	225
20	Kaliniot	Albania	244	250	190	193	286	286	282	282	226	226	114	120	211	262	282	282	243	243	242	254	204	216	292	292	250	250	249	249	290	290	152	155	257	260	238	247	190	199	208	220	219	219
21	Unnamed	China	244	247	190	190	286	286	330	357	223	223	123	135	211	262	300	300	249	249	251	254	204	207	298	298	238	250	249	249	302	302	0	0	260	260	235	244	199	214	208	220	225	225
22	Chenggu53	China	244	247	184	193	295	304	282	327	220	226	123	135	262	268	282	303	246	246	251	263	207	207	283	283	241	241	249	249	311	311	149	152	260	260	238	238	190	196	205	208	225	225
23	M1	Unknown	244	250	178	190	286	286	282	282	226	226	114	120	262	262	282	282	243	246	242	263	204	207	292	292	238	238	261	261	299	299	152	152	257	257	238	247	190	214	208	220	219	219
25	Manzanilla de Sevilla	Spain	244	244	178	190	295	295	282	282	226	226	120	135	262	262	303	303	246	249	254	263	204	204	283	292	238	241	249	249	299	299	149	152	251	260	238	244	190	196	208	220	219	219
26	Chenggu32	China	247	247	184	190	295	304	282	330	220	223	117	120	262	268	303	303	249	249	257	257	201	201	283	283	241	241	249	249	290	311	149	149	260	266	238	238	196	199	211	220	225	225
28	Ascolano Tenera	Italy	250	250	184	190	304	304	282	282	223	226	120	135	211	268	282	285	249	249	242	251	201	201	283	298	241	241	252	261	290	311	149	152	257	266	238	238	190	214	220	229	216	216
29	M3	Unknown	244	250	178	190	286	286	282	282	226	226	114	120	262	262	282	282	243	246	242	263	201	207	292	292	238	238	261	261	299	299	152	152	257	257	238	247	190	190	208	220	219	219
30	Elbasan	Albania	244	250	178	190	286	286	282	282	226	226	114	120	211	262	282	285	246	246	254	254	204	204	292	292	250	250	249	261	290	299	152	155	257	257	238	238	199	214	208	220	219	219
31	LvyuanNo.8	China	247	250	184	190	304	304	282	282	220	223	114	135	262	262	303	303	246	249	242	251	207	207	298	319	238	250	249	261	290	290	149	149	257	266	238	244	190	196	208	208	225	225
32	Picual	Spain	247	247	190	193	289	289	282	282	226	226	114	123	211	262	285	285	246	246	248	254	204	204	292	292	238	241	252	252	299	302	152	152	260	260	238	244	190	214	208	208	225	225
33	Coratina	Italy	250	250	184	184	286	286	357	357	220	226	117	135	211	262	282	300	249	258	251	257	204	204	292	298	250	250	249	249	290	290	149	149	251	260	238	238	190	196	208	208	216	216
34	M2	Unknown	244	247	190	190	286	286	282	282	226	226	120	120	262	268	282	285	249	249	242	263	204	207	292	292	250	250	0	0	314	314	152	155	257	260	238	247	199	214	208	220	219	219
35	M4	Unknown	244	250	178	193	286	286	282	282	226	226	114	120	262	268	384	384	246	246	254	263	204	207	292	298	250	250	261	261	290	290	152	155	257	260	238	238	199	214	208	220	219	219
37	EzhiNo.8	China	244	247	178	184	286	286	330	357	220	226	135	135	211	262	282	300	249	249	251	254	204	207	292	298	241	250	249	249	299	299	152	152	257	260	238	238	199	199	208	220	219	225
38	Kalamon	Greece	244	247	178	190	304	304	282	327	226	226	114	120	262	268	285	285	246	246	251	254	207	207	292	319	238	250	249	249	299	299	152	152	251	260	238	247	196	214	208	220	225	225
40	TaoyuanNo.1	China	244	250	184	190	286	286	282	330	220	223	117	135	211	268	282	303	249	249	242	257	201	201	298	298	238	238	249	249	290	302	149	152	251	266	238	238	190	196	208	208	216	225
41	Chenggu53	China	250	250	184	184	286	286	282	357	220	226	117	135	211	262	282	300	249	258	251	257	204	204	292	298	250	250	249	249	290	290	149	149	251	260	238	238	190	196	208	220	216	216
42	YunzaNo.3	China	250	250	184	190	286	286	282	282	220	229	111	117	256	268	276	282	243	258	254	257	201	201	289	298	238	238	249	255	290	308	152	152	251	260	235	238	196	208	208	211	216	216
43	Koroneiki	Greece	244	250	190	199	286	286	282	327	220	226	117	123	211	268	303	327	0	0	248	251	204	204	298	298	0	0	249	249	302	302	0	0	260	260	0	0	190	190	208	220	225	225
44	YunzaNo.2	China	250	250	184	190	286	286	282	282	220	229	111	117	256	268	276	282	243	258	254	257	201	201	289	298	238	238	249	255	290	308	152	152	251	260	235	238	196	208	211	220	216	216
45	Adramittini	Greece	244	247	190	193	295	295	282	282	223	226	120	123	211	268	303	303	243	246	257	260	204	204	283	319	238	241	249	249	302	302	152	152	251	260	238	238	190	196	208	220	219	225
46	Arbequina	Spain	244	244	193	199	286	286	330	330	223	226	117	135	268	268	303	303	246	249	251	251	201	207	298	298	238	238	255	255	302	302	149	155	257	266	238	244	190	190	205	211	225	225
48	YunzaNo.1	China	244	250	184	190	286	286	282	282	223	229	117	123	256	268	276	282	249	258	248	257	201	201	289	298	238	238	249	255	290	308	152	152	260	266	238	238	196	211	208	220	0	0
49	Arbequina	Spain	244	244	193	199	286	286	327	227	223	226	117	135	268	268	303	303	249	249	251	251	201	207	298	298	238	238	255	255	302	302	149	155	257	266	238	244	190	190	208	220	225	225
50	Koroneiki	Greece	244	250	190	199	286	286	282	282	220	226	117	123	211	268	303	327	243	246	248	251	204	204	298	298	238	238	249	249	302	302	149	155	0	0	0	0	190	190	211	211	219	225
51	Chalkidikis	Greece	247	247	190	193	295	295	327	327	223	226	114	120	262	268	285	285	246	249	254	263	204	204	292	319	241	250	261	261	302	302	152	152	251	257	238	241	190	214	208	208	219	219
52	JiufengNo.4	China	250	250	184	190	304	304	282	282	223	226	120	135	211	268	282	285	249	249	242	251	201	201	283	298	241	241	249	261	290	311	149	152	257	266	238	238	190	214	220	229	216	216
54	LvyuanNo.1	China	244	244	187	190	286	286	282	330	223	226	117	120	211	268	306	306	243	243	251	263	204	204	283	319	0	0	249	249	290	290	155	155	257	260	238	238	190	199	208	220	219	225
55	Chondrolia	Greece	244	244	190	193	295	304	282	357	226	226	114	120	262	268	285	285	243	246	251	254	204	204	292	319	238	250	249	261	299	302	0	0	257	260	238	244	190	214	208	223	219	219
57	Gaidourelia	Greece	0	0	178	193	295	298	330	330	223	226	114	117	262	262	285	291	246	246	251	260	204	207	289	292	238	250	0	0	302	302	143	143	251	260	238	238	190	217	211	220	219	219
58	Koutsourelia-Patrina	Greece	244	244	190	190	286	286	279	330	223	226	117	117	262	268	282	282	243	243	248	257	204	204	319	319	238	238	249	249	302	311	149	149	251	257	241	244	190	190	211	223	219	225
59	Koutsourelia	Greece	244	244	190	190	286	286	330	330	223	226	117	117	262	268	282	282	243	243	248	257	204	204	319	319	238	238	249	249	302	311	149	149	251	257	241	244	190	190	208	220	219	225
61	Gorossanne	Spain	244	250	184	190	286	286	282	330	220	223	117	135	211	268	282	303	249	249	242	257	201	201	298	298	238	238	249	249	290	302	149	152	251	266	238	238	190	196	211	220	216	225
98	Picual	Spain	250	250	190	193	286	286	282	282	220	226	120	135	262	268	300	300	246	249	251	257	201	201	292	298	238	238	249	249	290	290	152	152	260	260	238	244	196	196	208	220	219	219
99	Tanche	France	244	250	178	184	286	286	282	282	223	226	117	117	262	262	282	282	249	249	242	254	204	204	0	0	238	250	249	249	290	302	152	152	260	266	238	238	196	199	208	220	219	225
100	Kaliniot	Albania	247	247	190	190	289	289	282	282	223	226	117	117	262	268	282	282	249	249	251	251	204	207	319	319	238	238	249	249	302	302	152	155	251	260	238	238	190	214	211	223	219	219
101	Olea europaea subsp. cuspidata	China	250	250	184	184	283	283	282	282	?	?	123	126	?	?	294	294	258	258	254	254	204	204	?	?	238	238	255	255	302	308	?	?	250	250	?	?	?	?	211	220	219	219
