# Supplementary material for: The newly developed genomic-SSR markers uncover the genetic characteristics and relationships of olive accessions
Source: PeerJ. 2020 Feb 13;8:e8573. doi: 10.7717/peerj.8573 (PMC7024576; doi:10.7717/peerj.8573)
Supplement: Table S2 [file peerj-08-8573-s002.xlsx]

## Sheet: Sheet1
Table S2. Information of the 143 SSR markers.
Locus	Primer sequence (5’-3’)	Repeat motif	Ta (ºC)	Fluorescent labels	Size (bp)
BFU0102	F: ATTGAGCAGCCCGTGTCCT	(AAT)14	56	5'TAMRA	329
	R: TTGAGGCTTTGGTTGTCACTTG
BFU0104	F: CCCATACCAGTTCTGCCCTC	(ACC)5	56	5'FAM	248
	R: AGGATTCGCCCTATCACTATTGT
BFU0106	F: TCAGGAAGTCTGGAATGATGCTA	(TGA)5	56	5'FAM	209
	R: GACTGGAGGAAAATGCCTTGTT
BFU0107	F: TCATCAGCACGCCAAAAAGTT	(CAT)5	56	5'FAM	138
	R: AGCCTCAGCATCTCCCATTTT
BFU0108	F: TGAATGGAAGTTGCTGGAAGAT	(TTG)5	56	5'FAM	201
	R: GCAGCAATGGATTAGAGATGGT
BFU0109	F: GGGAAGAGGTGGAGCCGA	(GCA)5	56	5'FAM	159
	R: GCCCGCAGCAAGCAGTAG
BFU0111	F: CATCTGCTTCTCCACCTGCC	(ATG)5	56	5'FAM	243
	R: GAGTTGCCAAAACCAAAGCCT
BFU0201	F: CACTCGTCGTCAACTCCCTCG	(TTC)7	56	5'FAM	226
	R: CGATTGCTACTGCCCACTTCC
BFU0202	F: GTTAGAACAGGAGCCACCCACC	(CCA)7	56	5'FAM	175
	R: GCTCCTCCAACTCATCCAAACC
BFU0203	F: ACGAGGCAACCCTAACACACC	(ATT)8	56	5'TAMRA	243
	R: TCAGTGGTGGCATTTTGGACA
BFU0301	F: ACCGCCCAATCCTCGTCAT	(ACC)7	56	5'FAM	290
	R: CTTGCTGGAGAAGACAACGGA
BFU0302	F: GATGATGGAGCAGGAGTTGTCG	(CAT)6	56	5'FAM	235
	R: TGCTCCAAGCCGCAAACG
BFU0303	F: TTGGTGCTGACCTTGCTGC	(ATT)5	56	5'TAMRA	198
	R: CCCATAAAGCGGATAGGTTGC
BFU0307	F: CCTCTACAGCCATCGCACCA	(ACC)7	56	5'FAM	221
	R: GGAGAAGACAACGGAGAGAAGC
BFU0308	F: ACGAGGACCACTTTTTGGATTT	(ATC)5	56	5'FAM	312
	R: TCTGCTCCTTTACGGACGAATA
BFU0309	F: ACACGCAAGATGAAGGGGAC	(TGA)5	56	5'FAM	148
	R: TTTCCTTCATACTTGGGGATTTT
BFU0311	F: TCCAAAAAATCATCAGCACACA	(CAT)5	56	5'FAM	212
	R: CGTCCATCTTCTTCTCTCCCTG
BFU0401	F: TGGACCAGCCGAGCATTTC	(GAT)5	56	5'FAM	365
	R: GAGCAGGAGTTGCCGATACCA
BFU0402	F: CCGAGCAGAGCAAAAGTTCAG	(TTG)5	56	5'TAMRA	155
	R: TCGTAGCCAAGGGAAGAGAAAG
BFU0403	F: GATGGAGCAGGAGTTGGTAATG	(CAT)6	56	5'TAMRA	332
	R: GAACCCTCTCCTTCTCGTCGT
BFU0404	F: GCGAGCGTAATGGCAGTTTT	(TGA)5	56	5'FAM	242
	R: TCTCACACATTATGGCACACCC
BFU0405	F: TCCTCTCCCTAAAGTGTTTCCGA	(GAA)8	56	5'FAM	211
	R: TCAGGAAAAGGCTCTGCTCATCT
BFU0406	F: TCATAGGCTAAAGTGGGCATTG	(ATC)6	56	5'FAM	258
	R: GAAGGGAAGAGACGGCTGAGA
BFU0407	F: TGGTTGTGAGTAGATGGCTTCC	(ATG)7	56	5'FAM	152
	R: AACTGAATCCTACCAATGCCG
BFU0502	F: TTCTGGCAGCCTCAAGTATGTT	(TTA)5	56	5'ROX	235
	R: GATTGGCGGCTGCTATTGG
BFU0503	F: TGGCAAGCAGGATACTTACGAT	(AGC)5	56	5'ROX	214
	R: GAATGGATTGGGCTCTTCTGC
BFU0504	F: CAACACCAAAGTCTTCAAGGGAG	(ATC)5	56	5'HEX	268
	R: AACAATCTGCCCATCCATCG
BFU0505	F: CAGCCTCAGCGTCTCCCAT	(TGA)5	56	5'HEX	241
	R: TAGTTTGGACGAAGCAGCCC
BFU0507	F: GCCAGTTTCAGCATCTCCCA	(ATG)6	56	5'FAM	275
	R: AAGGTTCCAGGACTAAGGGTTTC
BFU0508	F: TCGCACTAAACAGTCTGCTCGT	(TGA)6	56	5'HEX	234
	R: TCCAAAAAATCATCAGCACACAG
BFU0509	F: TTGATGAGGAGGCTTCCACTAA	(TGA)5	56	5'HEX	269
	R: CTCCCAGTCCTTGAGAGATTGA
BFU0510	F: AGGAAGAAGGGGATAAAGTGGG	(AGA)9	56	5'FAM	108
	R: CTTGCGGGACTTTGACGAAC
BFU0511	F: GCTCGCATTGGGTTCCTTTA	(AAT)6	56	5'FAM	260
	R: CGCAAATCCCCTTTTCCTCT
BFU0601	F: CTCTACCTGCCAAGGCTACTGC	(ATG)6	56	5'FAM	244
	R: AACGGAGCAAGAACTGCCAAA
BFU0602	F: GCCCAAACACATAACACAAACG	(AGA)6	56	5'ROX	288
	R: CCAAGCCGCCACCTGTTC
BFU0701	F: TGCCCTCTACAAACTGCTGATG	(TTA)6	56	5'HEX	339
	R: ATGAATGGTGGCGAGACCTAAA
BFU0702	F: TTTGGGTTGCCATTTTTGTCT	(GGT)5	56	5'ROX	332
	R: CAATGCTTTCCACACCTACGAG
BFU0703	F: TTCTTCCAAACTCCGCCGT	(TCT)5	56	5'ROX	261
	R: AGTTTGATTTCCTTGCTGCCC
BFU0706	F: GTGGATTAGGGTAGTCGGGGA	(TGA)6	56	5'FAM	219
	R: GGTAAGGTGTTTCTGTGGGTCC
BFU0707	F: TCGGTGGAAGAGTGTTCATCAA	(AAT)8	56	5'FAM	228
	R: CAGCGGTGGACCAACAGTG
BFU0802	F: TCCTGAAACTTCCAAAACTCCC	(GTC)5	56	5'TAMRA	293
	R: CATACAACGGCAAAACCAACAG
BFU0803	F: AGAGGGCATAACAGCGGTGA	(GGT)6	56	5'FAM	230
	R: TGTTACAATGAAGCCAAATCTGC
BFU0808	F: CTCGGTCCCCCTATCCTCC	(TCG)5	56	5'HEX	192
	R: TTGCGGAATGGGAAAATGC
BFU0809	F: AACAAGGAAAACCCCAACATCT	(ATC)6	56	5'HEX	146
	R: TTTTGCTACCCTTCATAGTGCG
BFU0901	F: TGAAGAGCCGCCAAGAACAATA	(TTA)6	56	5'HEX	176
	R: TCCTTCGTGGCTTTTCCATTTT
BFU0902	F: TCCAAACGCAATAGGATTCAAGA	(AGA)5	56	5'FAM	280
	R: TATTTCTCTTTCTCGCCCCCTC
BFU0903	F: GGAAGAATGAAACGACAAAGCC	(TCT)5	56	5'FAM	178
	R: TCGCAAATAAGACAAAAAAGGCT
BFU1001	F: CCGCTCTGGAACCTCCCTAAT	(CCT)5	56	5'HEX	147
	R: AGTGAGGCGATTGAGGAGAACG
BFU1003	F: TGGAGTGTTCCTCTGTGGTGAC	(GGA)5	56	5'FAM	275
	R: TGTCTTCTCTCCATCCACGCTT
BFU1004	F: AAGACGGACACGCTCAATAACAT	(CAT)5	56	5'HEX	226
	R: TGCTGGTCGCAGTCCATTATT
BFU1006	F: GCGGCTTCTCATAGCACACC	(GCT)5	56	5'HEX	156
	R: TCTCTGGTCTACGCCTCTCCC
BFU1007	F: AGGACTATCTGGCGATTGAGCA	(GCA)5	56	5'HEX	336
	R: CTGCCTTCAGTGCCTCATCAA
BFU1008	F: TGCCTATCCGTTTCCGACAC	(AAT)5	56	5'FAM	234
	R: GCGTTGTCTGGTTTTCATTGG
BFU1010	F: TGGCACGCAGACCTAAATGA	(AAT)5	56	5'HEX	149
	R: TTTTTGTCGTTTTATGGGCTTG
BFU1101	F: TGAACCAACTCATCTTCCCACC	(CCG)6	56	5'HEX	284
	R: ATGGGGAAATGAATGAAAGGCT
BFU1102	F: TGCCAACTTTTGCCTTGTGAT	(TCA)5	56	5'FAM	228
	R: TCAATCCGAATGCTTACCGTTT
BFU1104	F: CCATCTTCTTCTCTCCCTGTCAA	(TGA)5	56	5'HEX	321
	R: GCGTAGTCCCCTTATCAACCG
BFU1106	F: TCCATCCTAAACCCAGCACC	(CAT)5	56	5'HEX	225
	R: ACGACGGCTTTGTGGATTTT
BFU1202	F: CGTTACCTCCTGTCACGGCTA	(AAG)7	56	5'FAM	304
	R: CCAGATGGTTCTCCCAACAAGT
BFU1203	F: CAGGTTTGGACGAATCAGCC	(ATC)5	56	5'FAM	291
	R: CTTCCTGCCAAGCCTACTGC
BFU1204	F: ATCACAGCCAATAGTTCAAGCCT	(GAA)6	56	5'TAMRA	134
	R: TTCTCTGACTTCATACGGTGCTG
BFU1205	F: AGTAGAGAATGATGGAGCGGGA	(ATC)5	56	5'TAMRA	305
	R: GCTCGTGCTAAACAATCTGCC
BFU1206	F: TCCTGGATGTGTGTCAATGGTTA	(AAG)9	56	5'HEX	270
	R: AGATGGAGAAGGAGATGTGCTGA
BFU1208	F: CCTTTGTCTATTCGGAACCCC	(TGA)7	56	5'HEX	321
	R: GGAGATGGTAATGCCAAAGCC
BFU1209	F: CGAACAAACCATCAGCACATAGA	(TCA)7	56	5'HEX	207
	R: TCTCTTCCTACCAAGCCCACTG
BFU1210	F: TCTTTTGATGTTCGTTTGACTTT	(AAT)5	56	5'HEX	239
	R: TCCTGGTTTTTTCTGGGTGATT
BFU1211	F: CTGCCCATAAAGATGATGAACG	(ATA)7	56	5'HEX	187
	R: TTAGGCACAAACTGGGTGGATA
BFU1212	F: TCTTCTCTCCCCGCCAGG	(TGA)7	56	5'HEX	263
	R: CAGGAGATGGTAATGCCAAAGC
BFU1301	F: CTGCCAAGCCCACTGAAACTA	(TGA)5	56	5'TAMRA	264
	R: GCAAAAGATGATGGAGCAGGA
BFU1304	F: TGTTGTGGGTTAGGTTGACTGG	(TGA)5	56	5'TAMRA	239
	R: ATTGTCAGGTTTGGGCTCATCT
BFU1305	F: GGTAATCCACTTGGCACATCCT	(CAA)5	56	5'TAMRA	171
	R: TTTTTGCGAAGGGGAGTAAGTT
BFU1307	F: ACCTCTACCTCCCCATAATACGC	(CGA)5	56	5'HEX	216
	R: TCTGTGGCTCATTTGCGTCA
BFU1308	F: AGCGAGCAAAGCACATTCCA	(AAT)5	56	5'TAMRA	333
	R: TGCGTCAGAAACTCGGCG
BFU1309	F: GTGATGGAGGTGGTGATTTAGAA	(GCT)5	56	5'TAMRA	220
	R: GTGCCACATTCATTCCCCA
BFU1401	F: CTCTCCCTGTCAAGCCTACTGC	(TGA)6	56	5'TAMRA	354
	R: GGTTGTGATGAGGATTTTGGGA
BFU1402	F: TATGCTTCCGAATGTAGGAGTGA	(TTG)5	56	5'FAM	177
	R: GAATAACTCCTTGTTGCCACTCA
BFU1403	F: AGAAGGATGGAGGATACCGAGG	(GCG)5	56	5'HEX	168
	R: AGCCACTCTGGATTCTTTGACG
BFU1404	F: ACAATCTGCCCGTCCATCG	(TGA)6	56	5'HEX	276
	R: GAACTGCCAACACCAAAGCC
BFU1407	F: CCGCTCAGTGCGAAAATCA	(TGA)5	56	5'HEX	247
	R: TGAAGTTCGCTGGCATTGG
BFU1408	F: ACAGCCAAGAGTGCCCCAA	(TGA)5	56	5'TAMRA	262
	R: TGAAGCAGCCTCAGCGGA
BFU1409	F: GCGAAAGATGATGGAGCAGG	(ATC)6	56	5'TAMRA	256
	R: CTACAGCCAAGAGTGCCCCA
BFU1411	F: ACAAATCAGCGAAACTTAGGCG	(TTA)5	56	5'HEX	324
	R: CACGCAAAAGGTGATTGTGAGA
BFU1412	F: ACAGCCAAGAGTGCCCCAA	(TGA)5	56	5'HEX	263
	R: ATGAAGCAGCCTCAGCGGA
BFU1413	F: ATCACATCCAATGCTCACCTCA	(AAG)5	56	5'HEX	192
	R: CGCTAACCACCGCCAGAAG
BFU1414	F: AGTGGCTTGGGACCTGGG	(TCA)5	56	5'HEX	178
	R: CCGCAAAGGAGGGAGGAA
BFU1502	F: CTCTTCCTGCTAAGCCCACTGT	(TGA)5	56	5'HEX	121
	R: CTCCTGACGATGAGAGCGATG
BFU1503	F: TCTCGCATTGGATGGGTTTAG	(TAG)5	56	5'HEX	205
	R: CACGAGTGGATGTAGCCTGGT
BFU1506	F: GCCGCCATTACCAAAGACC	(TGG)5	56	5'HEX	247
	R: ATTCCATCTCGTCACCGTCG
BFU1508	F: GAAGATGATGGAGCAGGAGTTGT	(CAT)5	56	5'TAMRA	270
	R: TCTTCTCTCTTTGCCAAGCCTAC
BFU1510	F: TTCTGTCAGTTTCTCGTGTTGCT	(TAT)19	56	5'HEX	279
	R: CCATCTTCCATAAATGCCTTGA
BFU1511	F: GAAGATGATGGAGCAGGAGTTGT	(CAT)5	56	5'TAMRA	316
	R: TTTGTCTGTTCGGAGCCCC
BFU1512	F: CGCTCCACCCCCTAAGTCTAT	(GAA)6	56	5'TAMRA	242
	R: CTTCTCCCTCTTGTGCCCTATT
BFU1601	F: AAGTCGGAAGATTACGAGCCC	(CAG)5	56	5'TAMRA	221
	R: GGCAAGGCAAGGAGACATCA
BFU1602	F: ATTACCTTCCTCCTGACGATGA	(TCA)5	56	5'HEX	201
	R: GTTCACTCCCGTGTCCATTAGG
BFU1603	F: TGTCGGTGTAACCCTTTCCAGA	(AAT)5	56	5'HEX	214
	R: TTAGGTAAACCCCGCCTTGTG
BFU1604	F: TTGGGAGTGTGGGTGGGTAA	(TAT)7	56	5'TAMRA	189
	R: GATGAAAACCGTAAAAAAGGGC
BFU1606	F: GGTAACCACTGCCATCCGC	(CAC)5	56	5'HEX	229
	R: TGTTTGGCTCCAGCACCC
BFU1607	F: ACCACTTGTAGAGGTCCCCGA	(TGA)5	56	5'HEX	267
	R: TCACCAAGGGATAAGTGGAAGG
BFU1701	F: ATCAGTTTGGCAAGAGCAGGAG	(GAT)5	56	5'TAMRA	297
	R: TTGGTAAGGTGCTTTTCTGGGT
BFU1703	F: GCTCGGCATTTCAGGGCTA	(TCA)5	56	5'HEX	253
	R: CATCCCAACCCCAGCCTC
BFU1704	F: TTTAGAAACCTTGCCCGTGTCT	(TAC)5	56	5'TAMRA	272
	R: ATGCTATGTGGCTATCACTTTGC
BFU1708	F: TGCGTGTCATTCCTTCTTCCAT	(TCT)5	56	5'ROX	127
	R: GCCCATTCACTTGTGGCTTTA
BFU1709	F: CACCTGAGGACTTGCTGGACA	(CTG)6	56	5'ROX	360
	R: CAAGGGATGAATCTTTACACGAA
BFU1710	F: AGGCGACTCTACGGTTGCTG	(AGA)6	56	5'TAMRA	217
	R: GACCTTTGCTTTCTTGACGACA
BFU1711	F: TTCCCAATAACGAACGACCAC	(CAC)5	56	5'TAMRA	171
	R: TGGGTTGCGATTCAATGGAT
BFU1713	F: CCAGTCTCAGCATCTCCCATTC	(TGA)5	56	5'TAMRA	219
	R: CGGAGGATGATGGAGCAGG
BFU1802	F: CCTCAGCGTCTCCCATTTTG	(GAT)5	56	5'HEX	302
	R: GTGGCTCGTCCATTGGTTGT
BFU1803	F: CAACAACTCAAAAGGTTTCCGA	(AAG)5	56	5'HEX	281
	R: TTGACAATGGAAGAAGGAGGCT
BFU1804	F: ATGATGGAGCAGGAGTTGTCG	(CAT)5	56	5'ROX	225
	R: AAGCCGCAAACGACCAGC
BFU1805	F: CCAGTCTCAGCATCTCCCATTT	(GAT)6	56	5'ROX	235
	R: TTGGATGAAGTAGCCTCAGCAG
BFU1806	F: ATCTCCGACGACCCGAAAA	(GCA)6	56	5'TAMRA	237
	R: TGGTAGCGACAGCGGTGG
BFU1807	F: TCTCTCCCTGCCAAGCCTACT	(TGA)8	56	5'TAMRA	280
	R: CAGCAGAGGATGATAGAGCAGGA
BFU1808	F: TTCGTATCCAAAAGCCACACC	(ATC)5	56	5'ROX	147
	R: GGTGGAGCCATTCAGTCATTG
BFU1809	F: GATGATGGGGCAGGAGTTGTC	(CAT)5	56	5'ROX	210
	R: AGCCTCAGCATCTCCCATTCT
BFU1810	F: TGCTTTATTTCAGTCCATTACCA	(AAT)14	56	5'TAMRA	134
	R: GATTCACTCCCCTGTCTCGG
BFU1813	F: TTTTGTGTGGTTTTGTTGTGTCA	(ATT)7	56	5'TAMRA	210
	R: TTCTGGGACAATAAAAGGGGG
BFU1814	F: CAAACCCGACCTGATAAGCG	(TTA)18	56	5'ROX	223
	R: CCACCCGAAACGCCTACTC
BFU1901	F: GGTGAGCAACAGAACTGCGTAA	(ACT)5	56	5'ROX	194
	R: TTCGCAAGAGGAAGTTTTGAGTC
BFU1902	F: CAAACGGTCCCAATCCCATA	(CTC)5	56	5'HEX	178
	R: GGACTGACTGCTGGTGGCG
BFU1903	F: ATGCTGCTCTGCTCCCTATGTT	(TCT)7	56	5'HEX	267
	R: TCTACTTGCTTCGCACTCGGA
BFU1908	F: GGTGAGCAACAGAACTGCGTAA	(ACT)5	56	5'ROX	193
	R: TCGCAAGAGGAAGTTTTGAGTC
BFU1909	F: TCGTGCTAAACAGTCTGCTCATC	(GAT)7	56	5'ROX	321
	R: TTTGGACGAAGCAGCCTCA
BFU1910	F: TCTCTCCCTGCCAAGCCTATTA	(GAT)5	56	5'ROX	201
	R: GTCCAAAAAATCATCAGCACACA
BFU2001	F: ATGGAAGATGAGCGGCTTACCT	(AGA)7	56	5'ROX	302
	R: GGCAAATCGTTCATAAACCCTAA
BFU2003	F: CGGATGAGTCAGCAGATAATGGA	(TGA)7	56	5'TAMRA	166
	R: CAGTTCTTGGGTCATTTCGTTTC
BFU2007	F: AAGCGGGAGCGATACTTTGATA	(CAG)7	56	5'TAMRA	364
	R: CAAGTTGCCAAAAGAAGACCTG
BFU2008	F: AAGCCGCAAACAGCCAGC	(ATG)5	56	5'ROX	272
	R: CGTAGCCCCCTCATCAACC
BFU2010	F: GCAGCCAAGAGTGCCCTAAG	(TGA)5	56	5'ROX	331
	R: TGTGATGAGGATTCTGGGACTG
BFU2011	F: AAGCCGCAAACAGCCAGC	(ATG)5	56	5'ROX	272
	R: CGTAGCCCCCTCATCAACCA
BFU2102	F: GCAGATAGAGAGACGAACCGCC	(AAG)6	56	5'TAMRA	129
	R: TTCACAGCAAGCCCAAGTCCT
BFU2103	F: GAAGAAGGTGGATAGGCAAGGG	(TGA)5	56	5'TAMRA	223
	R: CCGTCTATCCATCCTATCGTCC
BFU2105	F: GGGCTGGGTAGGCGTGAA	(TGA)5	56	5'ROX	224
	R: TATGCTTTCGGGTCGCTTCT
BFU2106	F: AGTGGCTCAGCATTGAAGTGTT	(TCA)7	56	5'TAMRA	157
	R: CAAGTGTGCCCATCCAATCC
BFU2107	F: CGTCAAAGGAGGGAGAAAGTG	(GAT)6	56	5'TAMRA	225
	R: GGTCGCCTCTTCCATCATACTT
BFU2201	F: TTCACAATCGGGATGGCACTT	(TCA)5	56	5'ROX	247
	R: GTCCATACAATCCACCCCTACG
BFU2202	F: ACTCCAATCCAAGCGGTGC	(CCA)7	56	5'TAMRA	210
	R: CGACTGAGGTGTTCTGCTTGC
BFU2203	F: TCTAACCAACCCATCGTTCGTC	(CCA)5	56	5'TAMRA	173
	R: TGGTGAATACGGTGATTGTGATG
BFU2302	F: TGGCACATTTGGTTTTGCTCTA	(CCA)5	56	5'TAMRA	125
	R: TCCACATCCACCTTGGTAGCC
BFU2304	F: CAGCCTCAGCATCTCCCATTC	(TGA)6	56	5'ROX	214
	R: ATGATGGGGCAGGATTTGG
BFU2305	F: CAGATGATGGTGCGTTGAATGT	(ATC)6	56	5'ROX	241
	R: ACTCCTCCACCCGAAACAAAT
BFU2309	F: GCAGCCAAAAGTGCCCCTA	(GAT)7	56	5'ROX	263
	R: TGGATGAAGCAGCCTCAGTAGA
BFU2310	F: TCTTCCTGCCAAGCCCACT	(GAT)6	56	5'ROX	268
	R: CAGCAGAGGGTGATGGAGCA
BFU2311	F: TTTAGGGACGGATGTAGGACCA	(AAT)5	56	5'ROX	190
	R: GAGCCATTATTACATTTCCGCA
