# Supplementary material for: The newly developed genomic-SSR markers uncover the genetic characteristics and relationships of olive accessions
Source: PeerJ. 2020 Feb 13;8:e8573. doi: 10.7717/peerj.8573 (PMC7024576; doi:10.7717/peerj.8573)
Supplement: Table S3 [file peerj-08-8573-s003.xlsx]

## Sheet: Sheet1
Table S3. The DNA fingerprints of the 53 olive cultivars based on the 21 SSR markers.
Code	Cultivar	DNA fingerprints
1	Xi No.3	BFU0201,244,244/BFU0202,187,190/BFU0301,286,289/BFU0308,330,330/BFU0405,217,223/BFU0510,120,135/BFU0601,211,268/BFU0602,306,306/BFU0707,243,246/BFU0803,251,257/BFU0808,201,207/BFU0902,283,283/BFU1004,238,238/BFU1008,249,249/BFU1101,290,290/BFU1204,155,155/BFU1304,257,257/BFU1309,235,235/BFU1902,190,190/BFU1908,208,220/BFU2202,216,225
2	Frantoio	BFU0201,244,250/BFU0202,184,190/BFU0301,286,289/BFU0308,282,330/BFU0405,220,223/BFU0510,117,135/BFU0601,211,268/BFU0602,282,303/BFU0707,243,249/BFU0803,242,257/BFU0808,201,201/BFU0902,298,298/BFU1004,238,238/BFU1008,252,252/BFU1101,290,302/BFU1204,149,152/BFU1304,251,266/BFU1309,238,238/BFU1902,190,196/BFU1908,208,208/BFU2202,216,225
3	Berat	BFU0201,244,244/BFU0202,178,190/BFU0301,304,304/BFU0308,282,330/BFU0405,226,226/BFU0510,114,120/BFU0601,262,268/BFU0602,285,303/BFU0707,246,249/BFU0803,251,251/BFU0808,201,207/BFU0902,283,292/BFU1004,241,241/BFU1008,252,252/BFU1101,299,311/BFU1204,149,149/BFU1304,251,257/BFU1309,238,238/BFU1902,196,196/BFU1908,208,223/BFU2202,225,225
4	Dritta	BFU0201,247,247/BFU0202,190,193/BFU0301,289,289/BFU0308,357,357/BFU0405,226,226/BFU0510,114,123/BFU0601,211,262/BFU0602,285,285/BFU0707,246,246/BFU0803,251,254/BFU0808,204,204/BFU0902,292,292/BFU1004,238,241/BFU1008,252,252/BFU1101,290,302/BFU1204,152,152/BFU1304,260,260/BFU1309,238,244/BFU1902,190,214/BFU1908,208,208/BFU2202,225,225
5	Rosciola	BFU0201,247,247/BFU0202,190,193/BFU0301,289,289/BFU0308,357,357/BFU0405,226,226/BFU0510,114,123/BFU0601,211,262/BFU0602,285,285/BFU0707,246,246/BFU0803,251,254/BFU0808,204,204/BFU0902,292,292/BFU1004,238,241/BFU1008,249,249/BFU1101,299,302/BFU1204,152,152/BFU1304,260,260/BFU1309,238,244/BFU1902,190,214/BFU1908,208,220/BFU2202,225,225
6	Grignan	BFU0201,247,250/BFU0202,184,193/BFU0301,304,304/BFU0308,282,282/BFU0405,220,220/BFU0510,117,135/BFU0601,211,262/BFU0602,282,282/BFU0707,246,249/BFU0803,251,257/BFU0808,201,207/BFU0902,298,298/BFU1004,241,241/BFU1008,252,252/BFU1101,290,290/BFU1204,149,152/BFU1304,260,266/BFU1309,238,244/BFU1902,196,199/BFU1908,208,208/BFU2202,225,225
8	Leccino	BFU0201,247,250/BFU0202,184,193/BFU0308,282,282/BFU0405,220,220/BFU0510,117,135/BFU0601,211,262/BFU0602,282,282/BFU0707,246,249/BFU0803,251,257/BFU0808,201,207/BFU0902,298,298/BFU1004,241,241/BFU1008,252,252/BFU1101,290,290/BFU1204,149,152/BFU1304,260,266/BFU1309,241,241/BFU1902,196,199/BFU1908,208,208/BFU2202,225,225
9	Chenggu32-9	BFU0201,244,244/BFU0202,178,190/BFU0301,286,286/BFU0308,282,357/BFU0405,226,226/BFU0510,114,135/BFU0601,211,262/BFU0602,282,285/BFU0707,246,246/BFU0803,242,254/BFU0808,204,204/BFU0902,298,298/BFU1004,238,238/BFU1008,249,249/BFU1101,299,299/BFU1204,152,152/BFU1304,257,257/BFU1309,238,238/BFU1902,190,214/BFU1908,208,220/BFU2202,219,219
10	Ottibratica	BFU0201,247,250/BFU0202,190,199/BFU0301,286,295/BFU0308,282,282/BFU0405,220,226/BFU0510,117,117/BFU0601,262,268/BFU0602,291,315/BFU0707,249,249/BFU0803,248,251/BFU0808,201,207/BFU0902,319,319/BFU1004,241,241/BFU1008,255,255/BFU1101,302,302/BFU1204,149,152/BFU1304,260,260/BFU1902,190,196/BFU1908,208,208/BFU2202,219,219
11	Mixaj-11	BFU0201,247,250/BFU0202,190,199/BFU0301,286,295/BFU0308,282,282/BFU0405,220,226/BFU0510,117,117/BFU0601,262,268/BFU0803,248,251/BFU0808,201,207/BFU0902,319,319/BFU1004,241,241/BFU1008,255,255/BFU1101,302,302/BFU1204,149,152/BFU1304,260,260/BFU1309,235,235/BFU1902,190,196/BFU1908,205,208/BFU2202,219,219
12	Lucques	BFU0201,244,250/BFU0202,184,190/BFU0301,286,286/BFU0308,282,330/BFU0405,220,223/BFU0510,117,135/BFU0601,211,268/BFU0602,282,303/BFU0707,249,249/BFU0803,242,257/BFU0808,201,201/BFU0902,298,298/BFU1004,238,238/BFU1008,249,249/BFU1101,290,302/BFU1204,149,152/BFU1304,251,266/BFU1309,238,238/BFU1902,190,196/BFU1908,208,220/BFU2202,216,225
13	Moraiolo	BFU0201,244,244/BFU0202,190,190/BFU0301,295,295/BFU0308,282,357/BFU0405,223,226/BFU0510,117,123/BFU0601,262,268/BFU0602,285,285/BFU0707,249,249/BFU0803,248,257/BFU0808,204,204/BFU0902,298,298/BFU1004,238,238/BFU1008,252,252/BFU1101,290,302/BFU1204,149,149/BFU1304,251,260/BFU1902,190,196/BFU1908,205,208/BFU2202,216,225/
16	Salonenqne	BFU0201,244,244/BFU0202,190,199/BFU0301,304,304/BFU0308,282,282/BFU0405,220,226/BFU0510,120,123/BFU0601,262,268/BFU0602,285,285/BFU0707,246,246/BFU0803,251,254/BFU0808,207,207/BFU0902,298,304/BFU1004,241,241/BFU1008,261,261/BFU1101,299,299/BFU1204,152,152/BFU1304,260,260/BFU1309,238,244/BFU1902,196,214/BFU1908,208,220/BFU2202,225,225
17	Unnamed-17	BFU0201,244,247/BFU0202,190,193/BFU0301,286,289/BFU0308,330,357/BFU0405,220,226/BFU0510,120,135/BFU0601,211,262/BFU0602,282,303/BFU0707,246,249/BFU0803,251,263/BFU0808,207,207/BFU0902,298,298/BFU1004,238,238/BFU1008,252,252/BFU1101,290,290/BFU1204,149,152/BFU1304,260,260/BFU1309,238,244/BFU1902,196,196/BFU1908,208,220/BFU2202,225,225
18	Jiufeng	BFU0201,250,250/BFU0202,184,190/BFU0301,304,304/BFU0308,282,282/BFU0405,223,226/BFU0510,120,135/BFU0601,211,268/BFU0602,282,285/BFU0707,249,249/BFU0803,242,251/BFU0808,201,201/BFU0902,298,298/BFU1004,241,241/BFU1008,252,261/BFU1101,290,311/BFU1204,149,152/BFU1304,266,266/BFU1309,238,238/BFU1902,190,214/BFU1908,208,220/BFU2202,216,216
19	Pendolino	BFU0201,250,250/BFU0202,184,190/BFU0301,304,304/BFU0308,282,282/BFU0405,220,226/BFU0510,117,135/BFU0601,211,268/BFU0602,282,282/BFU0707,246,246/BFU0803,242,251/BFU0808,201,201/BFU0902,292,298/BFU1004,238,238/BFU1008,249,261/BFU1101,290,302/BFU1204,152,152/BFU1304,260,266/BFU1309,238,238/BFU1902,190,199/BFU1908,208,220/BFU2202,225,225
20	Kaliniot-20	BFU0201,244,250/BFU0202,190,193/BFU0301,286,286/BFU0308,282,282/BFU0405,226,226/BFU0510,114,120/BFU0601,211,262/BFU0602,282,282/BFU0707,243,243/BFU0803,242,254/BFU0808,204,216/BFU0902,292,292/BFU1004,250,250/BFU1008,249,249/BFU1101,290,290/BFU1204,152,155/BFU1304,257,260/BFU1309,238,247/BFU1902,190,199/BFU1908,208,220/BFU2202,219,219
21	Unnamed-21	BFU0201,244,247/BFU0202,190,190/BFU0301,286,286/BFU0308,330,357/BFU0405,223,223/BFU0510,123,135/BFU0601,211,262/BFU0602,300,300/BFU0707,249,249/BFU0803,251,254/BFU0808,204,207/BFU0902,298,298/BFU1004,238,250/BFU1008,249,249/BFU1101,302,302/BFU1304,260,260/BFU1309,238,244/BFU1902,199,214/BFU1908,208,220/BFU2202,225,225
22	Chenggu53-22	BFU0201,244,247/BFU0202,184,193/BFU0301,295,304/BFU0308,282,327/BFU0405,220,226/BFU0510,123,135/BFU0602,282,303/BFU0707,246,246/BFU0803,251,263/BFU0808,207,207/BFU0902,283,283/BFU1004,241,241/BFU1008,249,249/BFU1101,311,311/BFU1204,149,152/BFU1304,260,260/BFU1309,238,238/BFU1902,190,196/BFU1908,205,208/BFU2202,225,225
23	M1	BFU0201,244,250/BFU0202,178,190/BFU0301,286,286/BFU0308,282,282/BFU0405,226,226/BFU0510,114,120/BFU0601,262,262/BFU0602,282,282/BFU0707,243,246/BFU0803,242,263/BFU0808,204,207/BFU0902,292,292/BFU1004,238,238/BFU1008,261,261/BFU1101,299,299/BFU1204,152,152/BFU1304,257,257/BFU1309,238,247/BFU1902,190,214/BFU1908,208,220/BFU2202,219,219
25	Manzanilla de Sevilla	BFU0201,244,244/BFU0202,178,190/BFU0301,295,295/BFU0308,282,282/BFU0405,226,226/BFU0510,120,135/BFU0601,262,262/BFU0602,303,303/BFU0707,246,249/BFU0803,254,263/BFU0808,204,204/BFU0902,283,292/BFU1004,238,241/BFU1008,249,249/BFU1101,299,299/BFU1204,149,152/BFU1304,260,260/BFU1309,238,244/BFU1902,190,196/BFU1908,208,220/BFU2202,219,219
26	Chenggu32-26	BFU0201,247,247/BFU0202,184,190/BFU0301,295,304/BFU0308,282,330/BFU0405,220,223/BFU0510,117,120/BFU0601,262,268/BFU0602,303,303/BFU0707,249,249/BFU0803,257,257/BFU0808,201,201/BFU0902,283,283/BFU1004,241,241/BFU1008,249,249/BFU1101,290,311/BFU1204,149,149/BFU1304,260,266/BFU1309,238,238/BFU1902,196,199/BFU1908,211,220/BFU2202,225,225
28	Ascolano Tenera	BFU0201,250,250/BFU0202,184,190/BFU0301,304,304/BFU0308,282,282/BFU0405,223,226/BFU0510,120,120/BFU0601,211,268/BFU0602,282,285/BFU0707,249,249/BFU0803,242,251/BFU0808,201,201/BFU0902,283,298/BFU1004,241,241/BFU1008,252,261/BFU1101,290,311/BFU1204,149,152/BFU1304,257,266/BFU1309,238,238/BFU1902,190,214/BFU1908,220,228/BFU2202,216,216
29	M3	BFU0201,244,250/BFU0202,178,190/BFU0301,286,286/BFU0308,282,282/BFU0405,226,226/BFU0510,114,120/BFU0601,262,262/BFU0602,282,384/BFU0707,246,246/BFU0803,242,263/BFU0808,201,207/BFU0902,292,292/BFU1004,238,238/BFU1008,261,261/BFU1101,299,299/BFU1204,152,152/BFU1304,257,257/BFU1309,238,247/BFU1902,190,190/BFU1908,208,220/BFU2202,219,219/
30	Elbasan	BFU0201,244,250/BFU0202,178,190/BFU0301,286,286/BFU0308,282,282/BFU0405,226,226/BFU0510,114,120/BFU0601,211,262/BFU0602,282,285/BFU0707,246,246/BFU0803,254,254/BFU0808,204,204/BFU0902,292,292/BFU1004,250,250/BFU1008,249,261/BFU1101,290,299/BFU1204,152,155/BFU1304,257,257/BFU1309,238,238/BFU1902,199,214/BFU1908,208,220/BFU2202,219,219
31	LvyuanNo.8	BFU0201,247,250/BFU0202,184,190/BFU0301,304,304/BFU0308,282,282/BFU0405,220,223/BFU0510,114,135/BFU0601,262,262/BFU0602,303,303/BFU0707,246,249/BFU0803,242,251/BFU0808,207,207/BFU0902,298,319/BFU1004,238,250/BFU1008,249,261/BFU1101,290,290/BFU1204,149,149/BFU1304,257,266/BFU1309,238,244/BFU1902,190,196/BFU1908,208,208/BFU2202,225,225/
32	Picual-32	BFU0201,247,247/BFU0202,190,193/BFU0301,289,289/BFU0308,282,282/BFU0405,226,226/BFU0510,114,123/BFU0601,211,262/BFU0602,285,285/BFU0707,246,246/BFU0803,248,254/BFU0808,204,204/BFU0902,292,292/BFU1004,238,241/BFU1008,252,252/BFU1101,299,302/BFU1204,152,152/BFU1304,260,260/BFU1309,238,244/BFU1902,190,214/BFU1908,208,208/BFU2202,225,225
33	Coratina	BFU0201,250,250/BFU0202,184,184/BFU0301,286,286/BFU0308,357,357/BFU0405,220,226/BFU0510,117,135/BFU0601,211,262/BFU0602,282,300/BFU0707,249,258/BFU0803,251,257/BFU0808,204,204/BFU0902,292,298/BFU1004,250,250/BFU1008,249,249/BFU1101,290,290/BFU1204,149,149/BFU1304,251,260/BFU1309,238,238/BFU1902,190,196/BFU1908,208,208/BFU2202,216,216
34	M2	BFU0201,244,247/BFU0202,190,190/BFU0301,286,286/BFU0308,282,282/BFU0405,226,226/BFU0510,120,120/BFU0601,262,268/BFU0602,282,285/BFU0707,249,249/BFU0803,242,263/BFU0808,204,207/BFU0902,292,292/BFU1004,250,250/BFU1101,314,314/BFU1204,152,155/BFU1304,257,260/BFU1309,238,247/BFU1902,199,214/BFU1908,208,220/BFU2202,219,219
35	M4	BFU0201,244,250/BFU0202,178,193/BFU0301,286,286/BFU0308,282,357/BFU0405,226,226/BFU0510,114,120/BFU0601,262,268/BFU0602,384,384/BFU0707,246,246/BFU0803,252,263/BFU0808,207,207/BFU0902,292,298/BFU1004,250,250/BFU1008,261,261/BFU1101,290,290/BFU1204,152,155/BFU1304,257,260/BFU1309,238,238/BFU1902,199,214/BFU1908,208,220/BFU2202,219,219/
37	EzhiNo.8	BFU0201,244,247/BFU0202,178,184/BFU0301,286,286/BFU0308,330,357/BFU0405,220,226/BFU0510,135,135/BFU0601,211,262/BFU0602,282,300/BFU0707,249,249/BFU0803,251,254/BFU0808,204,207/BFU0902,292,298/BFU1004,241,250/BFU1008,249,249/BFU1101,299,299/BFU1204,152,152/BFU1304,257,260/BFU1309,238,238/BFU1902,199,199/BFU1908,208,220/BFU2202,219,225
38	Kalamon	BFU0201,244,247/BFU0202,178,190/BFU0301,304,304/BFU0308,282,327/BFU0405,226,226/BFU0510,114,120/BFU0601,262,268/BFU0602,285,285/BFU0707,246,246/BFU0803,251,254/BFU0808,207,207/BFU0902,292,319/BFU1004,238,250/BFU1008,249,249/BFU1101,299,299/BFU1204,152,152/BFU1304,251,260/BFU1309,238,247/BFU1902,196,214/BFU1908,208,220/BFU2202,225,225
40	TaoyuanNo.1	BFU0201,244,250/BFU0202,184,190/BFU0301,286,286/BFU0308,282,330/BFU0405,220,223/BFU0510,117,135/BFU0601,211,268/BFU0602,282,303/BFU0707,249,249/BFU0803,242,257/BFU0808,201,201/BFU0902,298,298/BFU1004,238,238/BFU1008,249,249/BFU1101,290,290/BFU1204,149,152/BFU1304,251,266/BFU1309,238,238/BFU1902,190,196/BFU1908,208,208/BFU2202,216,225
41	Chenggu53-41	BFU0201,250,250/BFU0202,184,184/BFU0301,286,286/BFU0308,282,357/BFU0405,220,226/BFU0510,117,135/BFU0601,211,262/BFU0602,282,300/BFU0707,249,258/BFU0803,251,257/BFU0808,204,204/BFU0902,292,298/BFU1004,250,250/BFU1008,249,249/BFU1101,290,290/BFU1204,149,149/BFU1304,251,260/BFU1309,238,238/BFU1902,190,196/BFU1908,208,220/BFU2202,216,216
42	YunzaNo.3	BFU0201,250,250/BFU0202,184,190/BFU0301,286,286/BFU0308,282,282/BFU0405,220,229/BFU0510,111,117/BFU0601,256,268/BFU0602,276,282/BFU0707,243,258/BFU0803,254,257/BFU0808,201,201/BFU0902,289,298/BFU1004,238,238/BFU1008,249,255/BFU1101,290,308/BFU1204,152,152/BFU1304,251,260/BFU1309,235,238/BFU1902,196,208/BFU1908,208,211/BFU2202,216,216
43	Koroneiki-43	BFU0201,244,250/BFU0202,190,199/BFU0301,286,286/BFU0308,282,327/BFU0405,220,226/BFU0510,117,123/BFU0601,211,268/BFU0602,303,327/BFU0803,248,251/BFU0808,204,204/BFU0902,298,298/BFU1008,249,249/BFU1101,302,302/BFU1304,260,260/BFU1902,190,190/BFU1908,208,223/BFU2202,225,225
44	YunzaNo.2	BFU0201,250,250/BFU0202,184,190/BFU0301,286,286/BFU0308,282,282/BFU0405,220,229/BFU0510,111,117/BFU0601,256,268/BFU0602,276,282/BFU0707,243,258/BFU0803,254,257/BFU0808,201,201/BFU0902,289,298/BFU1004,238,238/BFU1008,249,255/BFU1101,290,308/BFU1204,152,152/BFU1304,251,260/BFU1309,235,238/BFU1902,196,208/BFU1908,211,220/BFU2202,216,216
45	Adramittini	BFU0201,244,247/BFU0202,190,193/BFU0301,295,295/BFU0308,282,330/BFU0405,223,226/BFU0510,120,123/BFU0601,211,268/BFU0602,303,303/BFU0707,243,246/BFU0803,257,260/BFU0808,204,204/BFU0902,283,319/BFU1004,238,241/BFU1008,249,249/BFU1101,302,302/BFU1204,152,152/BFU1304,251,260/BFU1309,238,238/BFU1902,190,196/BFU1908,208,223/BFU2202,219,225
46	Arbequina-46	BFU0201,244,244/BFU0202,193,199/BFU0301,286,286/BFU0308,285,330/BFU0405,223,226/BFU0510,117,135/BFU0601,268,268/BFU0602,303,303/BFU0707,246,249/BFU0803,251,251/BFU0808,201,207/BFU0902,298,298/BFU1004,238,238/BFU1008,255,255/BFU1101,302,302/BFU1204,149,155/BFU1304,257,266/BFU1309,238,244/BFU1902,190,190/BFU1908,205,211/BFU2202,225,225
48	YunzaNo.1	BFU0201,244,250/BFU0202,184,190/BFU0301,286,286/BFU0405,223,229/BFU0510,117,123/BFU0601,256,268/BFU0602,276,282/BFU0707,249,258/BFU0803,248,257/BFU0808,201,201/BFU0902,289,298/BFU1004,238,238/BFU1008,249,255/BFU1101,290,308/BFU1204,152,152/BFU1309,235,238/BFU1902,196,211/BFU1908,208,220
49	Arbequina-49	BFU0201,244,244/BFU0202,193,199/BFU0301,286,286/BFU0308,282,330/BFU0405,223,226/BFU0510,117,135/BFU0601,268,268/BFU0602,303,303/BFU0707,249,249/BFU0803,251,251/BFU0808,201,207/BFU0902,298,298/BFU1004,238,238/BFU1008,255,255/BFU1101,302,302/BFU1204,149,155/BFU1304,257,266/BFU1309,238,244/BFU1902,190,190/BFU1908,208,220/BFU2202,225,225
50	Koroneiki-50	BFU0201,244,250/BFU0202,190,199/BFU0301,286,286/BFU0308,282,330/BFU0405,220,226/BFU0510,117,123/BFU0601,211,268/BFU0602,303,327/BFU0707,243,246/BFU0803,248,251/BFU0808,204,204/BFU0902,298,298/BFU1008,249,249/BFU1101,302,302/BFU1204,149,155/BFU1304,260,260/BFU1902,190,190/BFU1908,211,211/BFU2202,225,225
51	Chalkidikis	BFU0201,247,247/BFU0202,190,193/BFU0301,295,295/BFU0308,327,327/BFU0405,223,226/BFU0510,114,120/BFU0601,262,268/BFU0602,285,285/BFU0707,246,249/BFU0803,254,263/BFU0808,204,204/BFU0902,292,319/BFU1004,241,250/BFU1008,261,261/BFU1101,302,302/BFU1204,152,152/BFU1304,251,257/BFU1309,238,241/BFU1902,190,214/BFU1908,208,208/BFU2202,219,219
52	JiufengNo.4	BFU0201,250,250/BFU0202,184,190/BFU0301,304,304/BFU0308,282,282/BFU0405,223,226/BFU0510,120,135/BFU0601,211,268/BFU0602,282,285/BFU0707,249,249/BFU0803,242,251/BFU0808,201,201/BFU0902,283,298/BFU1004,241,241/BFU1008,249,261/BFU1101,290,311/BFU1204,149,152/BFU1304,257,266/BFU1309,238,238/BFU1902,190,214/BFU2202,216,216
54	LvyuanNo.1	BFU0201,244,244/BFU0202,187,190/BFU0301,286,286/BFU0308,282,330/BFU0405,223,226/BFU0510,117,120/BFU0601,211,268/BFU0602,306,306/BFU0707,243,243/BFU0803,251,263/BFU0808,204,204/BFU0902,283,319/BFU1008,249,249/BFU1101,290,290/BFU1204,155,155/BFU1304,257,260/BFU1309,238,238/BFU1902,190,199/BFU1908,208,220/BFU2202,225,225/
55	Chondrolia	BFU0201,244,244/BFU0202,190,193/BFU0301,295,304/BFU0308,282,357/BFU0405,226,226/BFU0510,114,120/BFU0602,285,285/BFU0707,243,246/BFU0803,251,254/BFU0808,204,204/BFU0902,292,319/BFU1004,238,250/BFU1008,249,261/BFU1101,299,302/BFU1304,257,260/BFU1309,238,244/BFU1902,190,214/BFU1908,208,224/BFU2202,219,219
57	Gaidourelia	BFU0202,178,193/BFU0301,295,298/BFU0308,282,330/BFU0405,223,226/BFU0510,114,117/BFU0601,211,262/BFU0602,285,291/BFU0707,246,246/BFU0803,251,260/BFU0808,204,207/BFU0902,289,292/BFU1004,238,250/BFU1101,302,302/BFU1204,143,143/BFU1304,251,260/BFU1309,238,238/BFU1902,190,217/BFU1908,211,220/BFU2202,219,219
58	Koutsourelia-Patrina	BFU0201,244,244/BFU0202,190,190/BFU0301,286,286/BFU0308,279,330/BFU0405,223,226/BFU0510,117,117/BFU0601,262,268/BFU0602,282,282/BFU0707,243,243/BFU0803,248,257/BFU0808,204,204/BFU0902,319,319/BFU1004,238,238/BFU1008,249,249/BFU1101,302,311/BFU1204,149,149/BFU1304,251,257/BFU1309,241,244/BFU1902,190,190/BFU1908,211,223/BFU2202,219,225
59	Koutsourelia	BFU0201,244,244/BFU0202,190,190/BFU0301,286,286/BFU0308,282,330/BFU0405,223,226/BFU0510,117,117/BFU0601,262,268/BFU0602,282,282/BFU0707,243,243/BFU0803,248,257/BFU0808,204,204/BFU0902,319,319/BFU1004,238,238/BFU1008,249,249/BFU1101,302,311/BFU1204,149,149/BFU1304,251,257/BFU1309,241,244/BFU1902,190,190/BFU1908,208,220/BFU2202,219,225
61	Gorossanne	BFU0201,244,250/BFU0202,184,190/BFU0301,286,286/BFU0308,282,330/BFU0405,220,223/BFU0510,117,135/BFU0601,211,268/BFU0602,282,303/BFU0707,249,249/BFU0803,242,257/BFU0808,201,201/BFU0902,298,298/BFU1004,238,238/BFU1008,249,249/BFU1101,290,302/BFU1204,149,152/BFU1304,251,266/BFU1309,238,238/BFU1902,190,196/BFU1908,211,220/BFU2202,216,225
98	Picual-98	BFU0201,250,250/BFU0202,190,193/BFU0301,286,286/BFU0308,282,327/BFU0405,220,226/BFU0510,120,135/BFU0601,262,268/BFU0602,300,300/BFU0707,246,249/BFU0803,251,257/BFU0808,201,201/BFU0902,292,298/BFU1004,238,238/BFU1008,249,249/BFU1101,290,290/BFU1204,152,152/BFU1304,260,260/BFU1309,238,244/BFU1902,196,196/BFU1908,208,220/BFU2202,219,219/
99	Tanche	BFU0201,244,250/BFU0202,178,184/BFU0301,286,286/BFU0308,282,282/BFU0405,223,226/BFU0510,117,117/BFU0601,262,262/BFU0602,282,282/BFU0707,249,249/BFU0803,242,254/BFU0808,204,204/BFU1004,238,250/BFU1008,249,249/BFU1101,290,302/BFU1204,152,152/BFU1304,260,266/BFU1309,238,238/BFU1902,196,199/BFU1908,208,220/BFU2202,219,225
100	Kaliniot-100	BFU0201,247,247/BFU0202,190,190/BFU0301,289,289/BFU0308,282,282/BFU0405,223,226/BFU0510,117,117/BFU0601,262,268/BFU0602,282,282/BFU0707,249,249/BFU0803,251,251/BFU0808,204,207/BFU0902,319,319/BFU1004,238,238/BFU1008,249,249/BFU1101,302,302/BFU1204,152,155/BFU1304,251,260/BFU1309,238,238/BFU1902,190,214/BFU1908,208,223/BFU2202,219,219
