# Supplementary material for: The newly developed genomic-SSR markers uncover the genetic characteristics and relationships of olive accessions
Source: PeerJ. 2020 Feb 13;8:e8573. doi: 10.7717/peerj.8573 (PMC7024576; doi:10.7717/peerj.8573)
Supplement: Table S4 [file peerj-08-8573-s004.xlsx]

## Sheet: Sheet2
Table S4. The genetic similarity coefficient among the 53 accessions based on 21 SSR markers.
	Xi No.3	Frantoio	Berat	Dritta	Rosciola	Grignan	Leccino	Chenggu32-9	Ottibratica	Mixaj	Lucques	Moraiolo	Salonenqne	Unnamed-17	Jiufeng	Pendolino	Kaliniot-20	Unnamed-21	Chenggu53-22	M1	Manzanilla de Sevilla	Chenggu32-26	Ascolano Tenera	M3	Elbasan	LvyuanNo.8	Picual-32	Coratina	M2	M4	EzhiNo.8	Kalamon	TaoyuanNo.1	Chenggu53-41	YunzaNo.3	Koroneiki seed-43	YunzaNo.2	Adramittini	Arbequina-46	YunzaNo.1	Arbequina seed-49	Koroneiki-50	Chalkidikis	JiufengNo.4	LvyuanNo.1	Chondrolia	Gaidourelia	Koutsourelia-Patrina	Koutsourelia
Xi No.3	1
Frantoio	0.727273	1
Berat	0.645455	0.663636	1
Dritta	0.618182	0.636364	0.681818	1
Rosciola	0.627273	0.590909	0.672727	0.954546	1
Grignan	0.563636	0.745455	0.681818	0.727273	0.681818	1
Leccino	0.580952	0.752381	0.657143	0.704762	0.657143	0.971429	1
Chenggu32-9	0.672727	0.654546	0.681818	0.763636	0.809091	0.636364	0.628571	1
Ottibratica	0.561905	0.676191	0.666667	0.666667	0.657143	0.723809	0.74	0.619048	1
Mixaj	0.583333	0.666667	0.65625	0.645833	0.635417	0.697917	0.725275	0.614583	0.989011	1
Lucques	0.709091	0.927273	0.645455	0.6	0.609091	0.745455	0.742857	0.709091	0.676191	0.65625	1
Moraiolo	0.619048	0.752381	0.685714	0.742857	0.695238	0.685714	0.69	0.676191	0.714286	0.714286	0.752381	1
Salonenqne	0.609091	0.609091	0.763636	0.754545	0.781818	0.718182	0.676191	0.736364	0.714286	0.697917	0.627273	0.695238	1
Unnamed-17	0.681818	0.754545	0.709091	0.772727	0.745455	0.809091	0.8	0.718182	0.676191	0.65625	0.736364	0.695238	0.745455	1
Jiufeng	0.645455	0.772727	0.709091	0.681818	0.654546	0.754545	0.733333	0.718182	0.666667	0.645833	0.790909	0.685714	0.727273	0.690909	1
Pendolino	0.663636	0.772727	0.636364	0.718182	0.727273	0.790909	0.771429	0.736364	0.685714	0.677083	0.827273	0.666667	0.727273	0.709091	0.818182	1
Kaliniot-20	0.663636	0.627273	0.618182	0.718182	0.727273	0.627273	0.619048	0.809091	0.638095	0.614583	0.663636	0.619048	0.654546	0.672727	0.672727	0.727273	1
Unnamed-21	0.679245	0.669811	0.613208	0.773585	0.801887	0.707547	0.683168	0.754717	0.643564	0.597826	0.707547	0.712871	0.726415	0.792453	0.641509	0.688679	0.698113	1
Chenggu53-22	0.6	0.654546	0.736364	0.690909	0.7	0.763636	0.752381	0.654546	0.714286	0.739583	0.672727	0.676191	0.754545	0.754545	0.681818	0.718182	0.627273	0.650943	1
M1	0.663636	0.627273	0.709091	0.7	0.727273	0.590909	0.580952	0.863636	0.657143	0.645833	0.645455	0.619048	0.727273	0.690909	0.690909	0.709091	0.836364	0.650943	0.645455	1
Manzanilla de Sevilla	0.636364	0.636364	0.754545	0.727273	0.772727	0.654546	0.628571	0.8	0.704762	0.677083	0.672727	0.704762	0.754545	0.754545	0.663636	0.681818	0.736364	0.707547	0.763636	0.790909	1
Chenggu32-26	0.636364	0.709091	0.736364	0.6	0.609091	0.763636	0.752381	0.563636	0.695238	0.666667	0.763636	0.695238	0.681818	0.681818	0.718182	0.718182	0.609091	0.660377	0.745455	0.554546	0.709091	1
Ascolano Tenera	0.636364	0.727273	0.718182	0.654546	0.627273	0.709091	0.685714	0.690909	0.638095	0.614583	0.745455	0.657143	0.7	0.645455	0.954546	0.772727	0.663636	0.59434	0.654546	0.681818	0.636364	0.727273	1
M3	0.672727	0.636364	0.736364	0.672727	0.7	0.618182	0.609524	0.836364	0.685714	0.677083	0.672727	0.609524	0.718182	0.7	0.7	0.736364	0.809091	0.622641	0.654546	0.954546	0.781818	0.581818	0.690909	1
Elbasan	0.654546	0.6	0.7	0.727273	0.754545	0.618182	0.609524	0.872727	0.6	0.59375	0.636364	0.6	0.736364	0.663636	0.7	0.718182	0.881818	0.707547	0.6	0.863636	0.763636	0.6	0.690909	0.836364	1
LvyuanNo.8	0.636364	0.727273	0.7	0.672727	0.663636	0.781818	0.742857	0.690909	0.685714	0.65625	0.763636	0.666667	0.7	0.736364	0.736364	0.772727	0.645455	0.716981	0.727273	0.681818	0.690909	0.727273	0.709091	0.690909	0.654546	1
Picual-32	0.6	0.636364	0.7	0.945454	0.936364	0.690909	0.666667	0.781818	0.685714	0.666667	0.6	0.742857	0.772727	0.718182	0.663636	0.7	0.718182	0.735849	0.690909	0.736364	0.763636	0.6	0.636364	0.709091	0.745455	0.654546	1
Coratina	0.590909	0.736364	0.618182	0.681818	0.672727	0.772727	0.771429	0.7	0.685714	0.677083	0.772727	0.742857	0.618182	0.727273	0.709091	0.745455	0.709091	0.726415	0.681818	0.636364	0.681818	0.663636	0.663636	0.627273	0.681818	0.718182	0.627273	1
M2	0.622641	0.584906	0.688679	0.679245	0.688679	0.622641	0.613861	0.773585	0.693069	0.663044	0.622641	0.653465	0.726415	0.707547	0.698113	0.679245	0.839623	0.735294	0.660377	0.839623	0.735849	0.641509	0.688679	0.811321	0.839623	0.632076	0.698113	0.650943	1
M4	0.618182	0.563636	0.663636	0.709091	0.7	0.654546	0.647619	0.781818	0.619048	0.604167	0.581818	0.619048	0.736364	0.7	0.645455	0.681818	0.827273	0.707547	0.636364	0.827273	0.727273	0.581818	0.636364	0.818182	0.872727	0.636364	0.690909	0.663636	0.830189	1
EzhiNo.8	0.609091	0.627273	0.672727	0.7	0.745455	0.736364	0.733333	0.790909	0.647619	0.625	0.663636	0.590476	0.709091	0.763636	0.636364	0.709091	0.745455	0.839623	0.7	0.709091	0.736364	0.645455	0.609091	0.7	0.772727	0.663636	0.681818	0.781818	0.764151	0.754545	1
Kalamon	0.618182	0.581818	0.790909	0.745455	0.790909	0.636364	0.609524	0.763636	0.666667	0.645833	0.618182	0.666667	0.827273	0.7	0.645455	0.7	0.718182	0.716981	0.727273	0.772727	0.763636	0.654546	0.618182	0.763636	0.781818	0.709091	0.763636	0.627273	0.773585	0.745455	0.718182	1
TaoyuanNo.1	0.709091	0.927273	0.663636	0.6	0.590909	0.763636	0.761905	0.709091	0.676191	0.65625	0.981818	0.752381	0.627273	0.736364	0.790909	0.809091	0.663636	0.688679	0.690909	0.645455	0.672727	0.763636	0.745455	0.672727	0.636364	0.781818	0.6	0.790909	0.622641	0.581818	0.663636	0.618182	1
Chenggu53-41	0.590909	0.736364	0.618182	0.663636	0.672727	0.772727	0.771429	0.718182	0.685714	0.677083	0.790909	0.742857	0.636364	0.727273	0.727273	0.763636	0.727273	0.726415	0.681818	0.654546	0.7	0.681818	0.681818	0.645455	0.7	0.718182	0.627273	0.981818	0.669811	0.681818	0.781818	0.645455	0.790909	1
YunzaNo.3	0.618182	0.727273	0.554546	0.563636	0.554546	0.672727	0.666667	0.6	0.666667	0.6875	0.745455	0.647619	0.609091	0.609091	0.645455	0.718182	0.609091	0.566038	0.6	0.590909	0.563636	0.654546	0.618182	0.6	0.581818	0.618182	0.545454	0.736364	0.575472	0.563636	0.572727	0.6	0.763636	0.736364	1
Koroneiki seed-43	0.638298	0.734043	0.648936	0.712766	0.723404	0.659574	0.662921	0.691489	0.765957	0.77381	0.744681	0.755319	0.734043	0.691489	0.648936	0.765957	0.702128	0.734043	0.723404	0.659574	0.691489	0.62766	0.617021	0.638298	0.659574	0.680851	0.734043	0.734043	0.655556	0.638298	0.670213	0.670213	0.744681	0.734043	0.670213	1
YunzaNo.2	0.618182	0.709091	0.536364	0.545454	0.554546	0.654546	0.647619	0.6	0.647619	0.666667	0.745455	0.628571	0.609091	0.609091	0.645455	0.718182	0.609091	0.566038	0.581818	0.590909	0.563636	0.672727	0.636364	0.6	0.581818	0.6	0.527273	0.718182	0.575472	0.563636	0.572727	0.6	0.745455	0.736364	0.981818	0.648936	1
Adramittini	0.672727	0.672727	0.681818	0.727273	0.736364	0.6	0.590476	0.672727	0.657143	0.65625	0.690909	0.714286	0.663636	0.663636	0.609091	0.663636	0.681818	0.679245	0.727273	0.663636	0.745455	0.690909	0.6	0.636364	0.636364	0.618182	0.745455	0.590909	0.641509	0.618182	0.627273	0.690909	0.690909	0.590909	0.581818	0.755319	0.563636	1
Arbequina-46	0.690909	0.727273	0.681818	0.636364	0.627273	0.672727	0.647619	0.636364	0.685714	0.677083	0.727273	0.685714	0.645455	0.718182	0.645455	0.681818	0.572727	0.707547	0.672727	0.609091	0.636364	0.654546	0.636364	0.636364	0.563636	0.709091	0.618182	0.627273	0.603774	0.618182	0.627273	0.581818	0.727273	0.609091	0.581818	0.723404	0.581818	0.636364	1
YunzaNo.1	0.636364	0.727273	0.554546	0.563636	0.572727	0.672727	0.666667	0.618182	0.647619	0.645833	0.781818	0.704762	0.627273	0.627273	0.663636	0.718182	0.609091	0.641509	0.618182	0.590909	0.6	0.690909	0.636364	0.618182	0.6	0.636364	0.581818	0.663636	0.613208	0.581818	0.590909	0.618182	0.781818	0.681818	0.836364	0.712766	0.836364	0.6	0.618182	1
Arbequina seed-49	0.718182	0.772727	0.709091	0.645455	0.654546	0.7	0.676191	0.681818	0.733333	0.697917	0.790909	0.714286	0.690909	0.745455	0.709091	0.727273	0.636364	0.754717	0.681818	0.654546	0.681818	0.681818	0.681818	0.681818	0.609091	0.736364	0.645455	0.654546	0.669811	0.663636	0.672727	0.627273	0.772727	0.672727	0.609091	0.765957	0.609091	0.663636	0.936364	0.681818	1
Koroneiki-50	0.683168	0.752475	0.643564	0.673267	0.683168	0.623762	0.625	0.683168	0.70297	0.724138	0.752475	0.732673	0.683168	0.683168	0.613861	0.742574	0.673267	0.71134	0.663366	0.663366	0.653465	0.653465	0.613861	0.633663	0.643564	0.683168	0.693069	0.683168	0.608247	0.613861	0.623762	0.623762	0.752475	0.683168	0.663366	0.944444	0.663366	0.732673	0.80198	0.643564	0.792079	1
Chalkidikis	0.572727	0.572727	0.690909	0.772727	0.763636	0.572727	0.580952	0.718182	0.695238	0.666667	0.572727	0.676191	0.690909	0.618182	0.672727	0.618182	0.709091	0.650943	0.663636	0.745455	0.736364	0.609091	0.663636	0.718182	0.754545	0.663636	0.772727	0.618182	0.764151	0.754545	0.654546	0.754545	0.572727	0.6	0.5	0.62766	0.481818	0.736364	0.609091	0.518182	0.618182	0.574257	1
JiufengNo.4	0.663462	0.730769	0.711538	0.634615	0.634615	0.711538	0.686869	0.721154	0.636364	0.622222	0.778846	0.646465	0.692308	0.634615	0.961538	0.807692	0.673077	0.62	0.701923	0.673077	0.663462	0.740385	0.971154	0.682692	0.701923	0.75	0.615385	0.701923	0.68	0.625	0.634615	0.625	0.788462	0.711538	0.644231	0.647727	0.644231	0.625	0.663462	0.644231	0.692308	0.631579	0.663462	1
LvyuanNo.1	0.813084	0.682243	0.672897	0.672897	0.682243	0.607477	0.598039	0.700935	0.647059	0.634409	0.700935	0.686275	0.672897	0.691589	0.672897	0.728972	0.785047	0.737864	0.663551	0.71028	0.71028	0.719626	0.682243	0.682243	0.738318	0.654206	0.654206	0.672897	0.747573	0.719626	0.700935	0.691589	0.700935	0.691589	0.626168	0.755319	0.626168	0.766355	0.682243	0.64486	0.747664	0.765306	0.663551	0.693069	1
Chondrolia	0.59434	0.54717	0.716981	0.783019	0.811321	0.584906	0.544555	0.783019	0.653465	0.641304	0.54717	0.683168	0.754717	0.632076	0.632076	0.679245	0.764151	0.688679	0.660377	0.773585	0.773585	0.575472	0.622641	0.726415	0.792453	0.688679	0.783019	0.622641	0.735294	0.773585	0.660377	0.801887	0.54717	0.622641	0.537736	0.691489	0.518868	0.745283	0.622641	0.5	0.650943	0.670103	0.811321	0.65	0.708738	1
Gaidourelia	0.553398	0.563107	0.640777	0.708738	0.718447	0.582524	0.581633	0.68932	0.642857	0.617977	0.582524	0.653061	0.601942	0.61165	0.572816	0.650485	0.669903	0.666667	0.601942	0.68932	0.669903	0.592233	0.563107	0.679612	0.68932	0.61165	0.708738	0.640777	0.640777	0.679612	0.650485	0.699029	0.563107	0.660194	0.543689	0.62069	0.563107	0.699029	0.650485	0.514563	0.660194	0.659574	0.699029	0.546392	0.65	0.717172	1
Koutsourelia-Patrina	0.663636	0.681818	0.654546	0.627273	0.636364	0.554546	0.561905	0.681818	0.676191	0.65625	0.7	0.752381	0.581818	0.618182	0.581818	0.618182	0.654546	0.669811	0.609091	0.672727	0.645455	0.663636	0.590909	0.645455	0.627273	0.627273	0.645455	0.654546	0.632076	0.572727	0.618182	0.609091	0.7	0.636364	0.609091	0.734043	0.609091	0.736364	0.718182	0.609091	0.709091	0.792079	0.672727	0.615385	0.728972	0.698113	0.640777	1
Koutsourelia	0.7	0.718182	0.672727	0.645455	0.672727	0.590909	0.6	0.736364	0.714286	0.697917	0.754545	0.790476	0.636364	0.654546	0.636364	0.672727	0.709091	0.707547	0.645455	0.727273	0.7	0.681818	0.627273	0.7	0.681818	0.663636	0.681818	0.672727	0.688679	0.627273	0.654546	0.663636	0.736364	0.690909	0.627273	0.755319	0.627273	0.754545	0.7	0.663636	0.763636	0.792079	0.690909	0.634615	0.785047	0.716981	0.660194	0.945454	1
Gorossanne	0.690909	0.909091	0.627273	0.581818	0.590909	0.727273	0.723809	0.690909	0.657143	0.635417	0.981818	0.733333	0.609091	0.718182	0.772727	0.809091	0.645455	0.688679	0.654546	0.627273	0.654546	0.781818	0.745455	0.654546	0.618182	0.745455	0.581818	0.754545	0.603774	0.563636	0.645455	0.6	0.963636	0.772727	0.745455	0.723404	0.763636	0.672727	0.745455	0.763636	0.772727	0.772277	0.554546	0.778846	0.682243	0.528302	0.601942	0.718182	0.736364
Picual-98	0.654546	0.690909	0.681818	0.709091	0.718182	0.763636	0.742857	0.727273	0.742857	0.71875	0.745455	0.685714	0.754545	0.790909	0.718182	0.790909	0.736364	0.716981	0.709091	0.718182	0.781818	0.709091	0.672727	0.745455	0.727273	0.727273	0.690909	0.772727	0.716981	0.745455	0.718182	0.745455	0.745455	0.790909	0.727273	0.734043	0.727273	0.672727	0.672727	0.727273	0.718182	0.673267	0.681818	0.701923	0.682243	0.707547	0.631068	0.627273	0.681818
Tanche	0.596154	0.730769	0.615385	0.673077	0.682692	0.711538	0.707071	0.769231	0.676768	0.644444	0.788462	0.717172	0.673077	0.682692	0.682692	0.788462	0.798077	0.76	0.653846	0.740385	0.759615	0.711538	0.663462	0.730769	0.788462	0.721154	0.673077	0.75	0.76	0.759615	0.788462	0.721154	0.769231	0.769231	0.663462	0.704546	0.663462	0.663462	0.634615	0.759615	0.701923	0.652632	0.653846	0.673469	0.742574	0.66	0.690722	0.682692	0.740385
Kaliniot-100	0.645455	0.7	0.672727	0.754545	0.763636	0.663636	0.657143	0.736364	0.780952	0.760417	0.7	0.742857	0.690909	0.690909	0.690909	0.727273	0.709091	0.754717	0.7	0.727273	0.718182	0.663636	0.663636	0.7	0.7	0.7	0.754545	0.709091	0.783019	0.681818	0.690909	0.754545	0.7	0.709091	0.663636	0.755319	0.645455	0.772727	0.681818	0.645455	0.727273	0.70297	0.763636	0.692308	0.747664	0.764151	0.718447	0.763636	0.781818
max	0.989011
min	0.481818
mean	0.68629
[truncated: 4 more columns]
